# Supplementary material for: Loss of Pex1 in Inner Ear Hair Cells Contributes to Cochlear Synaptopathy and Hearing Loss
Source: MDPI journal article supplement (doi:10.3390/cells11243982), 2022-12-09
Supplement: s1 [file s1]

**A.**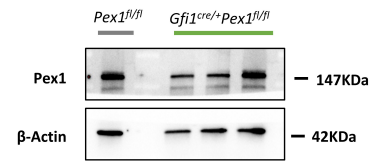**B.**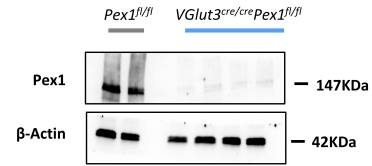**C.**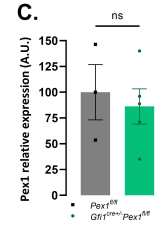**D.**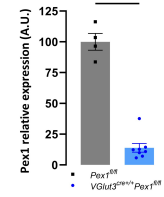

**Figure S1:** Characterization of new organ specific *Pex1* knockout mice.

(A-B) Western blot analysis of Pex1 protein expressed in liver at 6 weeks of age from *Gfi1<sup>cre/+</sup>Pex1<sup>fl/fl</sup>* (table S16; *Pex1<sup>fl/fl</sup>* (*n* = 3), *Gfi1<sup>cre/+</sup>Pex1<sup>fl/fl</sup>* (*n* = 5)); (B) and *VGlut3<sup>cre/cre</sup>Pex1<sup>fl/fl</sup>* mice line (*Pex1<sup>fl/fl</sup>* (*n* = 4), *Gfi1<sup>cre/+</sup>Pex1<sup>fl/fl</sup>* (*n* = 8)); (C-D) Quantification of Pex1 protein expression normalized to  $\beta$ -actin in *Gfi1<sup>cre/+</sup>Pex1<sup>fl/fl</sup>* (table S16 – Mean  $\pm$  S.E.M. - ns *p* = 0.6893, unpaired t-test with Welch's correction) (C) and *VGlut3<sup>cre/cre</sup>Pex1<sup>fl/fl</sup>* (table S16 – \*\*\* *p* = 0.0001, unpaired t-test with Welch's correction) (D).

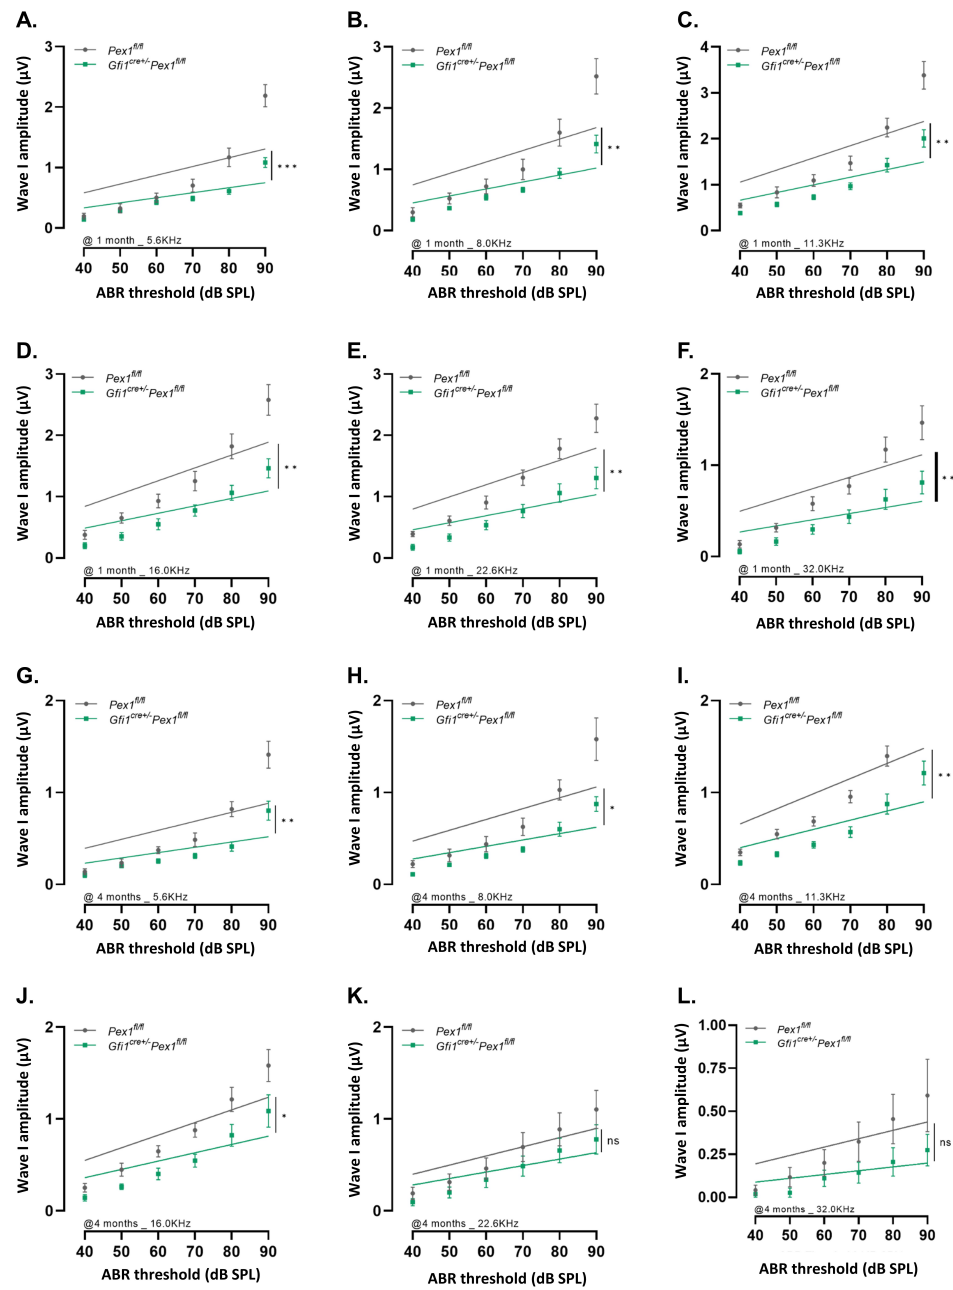

**Figure S2:** Decrease of the wave I amplitude observed over age during the recording of auditory brainstem responses (ABRs) in *Gfi1<sup>cre/+</sup>Pex1<sup>fl/fl</sup>* mice compared to control (*Pex1<sup>fl/fl</sup>*).

(A-F) Wave I amplitude ( $\mu$ V) as a function of ABRs threshold (dB sounds pressure level (SPL)) of pure tones recording at 5.6 (A), 8.0 (B), 11.3 (C), 16.0 (D), 22.6 (E), and 32.0 KHz (F) at 1 month (table S17 - Mean  $\pm$  S.E.M. - 5.6KHz: \*\*\*  $p = 0.0005$ , 8.0KHz: \*\*  $p = 0.0048$ , 11.3KHz: \*\*  $p = 0.0024$ , 16.0KHz: \*\*  $p = 0.0036$ , 22.6KHz: \*\*  $p = 0.0060$ , 32.0KHz: \*\*  $p = 0.0087$  - unpaired t-test - *Pex1<sup>fl/fl</sup>* (grey,  $n = 6$ ), *Gfi1<sup>cre/+</sup>Pex1<sup>fl/fl</sup>* (green,  $n = 12$ )); (G-L) Wave I amplitude ( $\mu$ V) as a function of ABRs threshold (dB sounds pressure level (SPL)) of pure tones recording at 5.6 (G), 8.0 (H), 11.3 (I), 16.0 (J), 22.6 (K), and 32.0 KHz (L) at 4 months (table S17 - Mean  $\pm$  S.E.M. - 5.6KHz: \*\*  $p = 0.0037$ , 8.0KHz: \*  $p = 0.0106$ , 11.3KHz: \*\*  $p = 0.0026$ , 16.0KHz: \*  $p = 0.0270$ , 22.6KHz ns  $p = 0.2770$ , 32.0KHz: ns  $p = 0.1669$  - unpaired t-test - *Pex1<sup>fl/fl</sup>* (grey,  $n = 8$ ), *Gfi1<sup>cre/+</sup>Pex1<sup>fl/fl</sup>* (green,  $n = 9$ )). The solid line represents the simple linear regression.



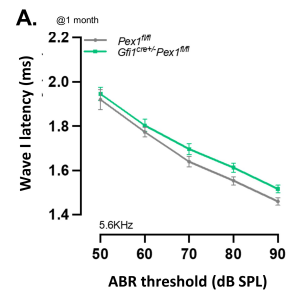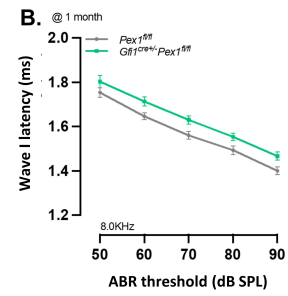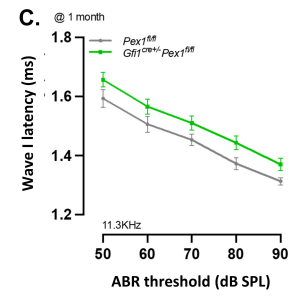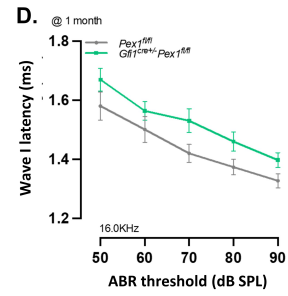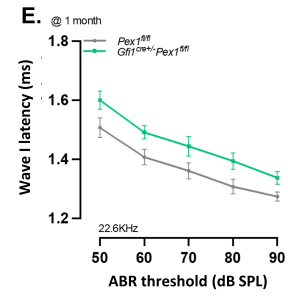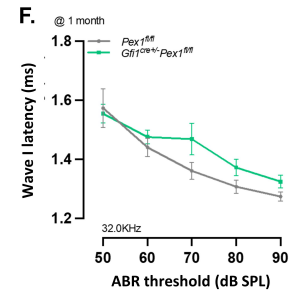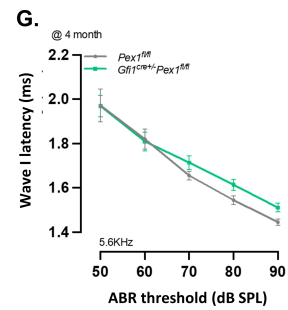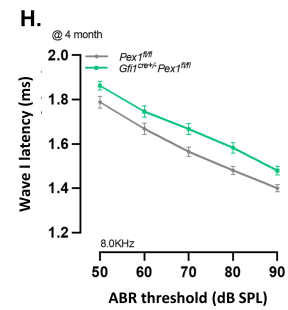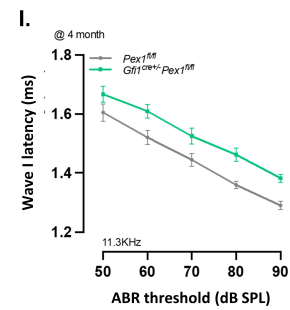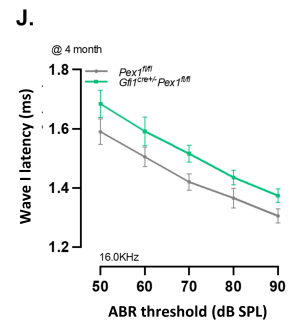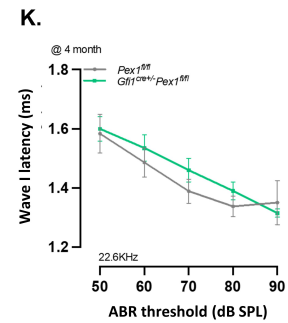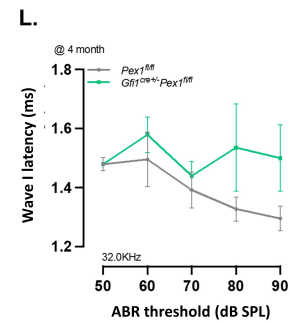

**Figure S3:** Slight increase of the wave I latency measured on ABR recordings in *Gfi1<sup>cre/+</sup>Pex1<sup>fl/fl</sup>* mice compared to control (*Pex1<sup>fl/fl</sup>*). (A-F) Wave I latency (ms) as a function of ABRs threshold (dB sounds pressure level (SPL)) of pure tones recording at 5.6 (A), 8.0 (B), 11.3 (C), 16.0 (D), 22.6 (E), and 32.0 KHz (F) at 1 month (Mean  $\pm$  S.E.M. - *Pex1<sup>fl/fl</sup>* (grey,  $n = 6$ ), *Gfi1<sup>cre/+</sup>Pex1<sup>fl/fl</sup>* (green,  $n = 12$ ); (G-L) Wave I latency (ms) as a function of ABRs threshold (dB sounds pressure level (SPL)) of pure tones recording at 5.6 (G), 8.0 (H), 11.3 (I), 16.0 (J), 22.6 (K), and 32.0 KHz (L) at 4 months (Mean  $\pm$  S.E.M. - *Pex1<sup>fl/fl</sup>* (grey,  $n = 6$ ), *Gfi1<sup>cre/+</sup>Pex1<sup>fl/fl</sup>* (green,  $n = 12$ )).

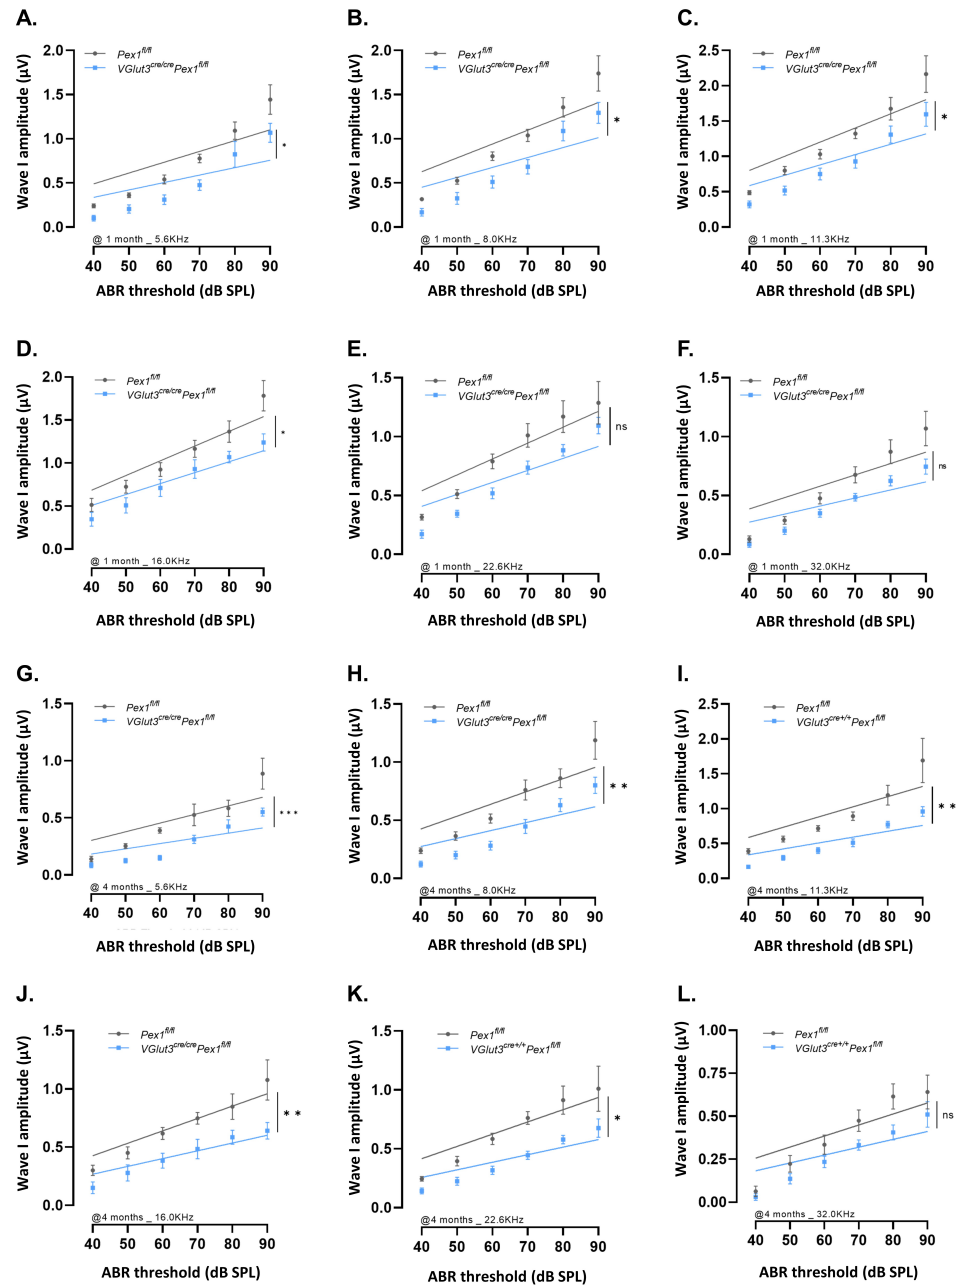

**Figure S4: Decrease of the wave I amplitude observed over age during ABR recordings in *VGlut3<sup>cre/cre</sup>Pex1<sup>fl/fl</sup>* mice compared to control (*Pex1<sup>fl/fl</sup>*).**

(A-F) Wave I amplitude ( $\mu\text{V}$ ) as a function of ABRs threshold (dB sounds pressure level (SPL)) of pure tones recording at 5.6 (A), 8.0 (B), 11.3 (C), 16.0 (D), 22.6 (E), and 32.0 KHz (F) at 1 month (table S18 - Mean  $\pm$  S.E.M. - 5.6KHz: \*  $p = 0.0174$ , 8.0KHz: \*  $p = 0.0175$ , 11.3KHz: \*  $p = 0.0283$ , 16.0KHz: \*  $p = 0.00265$ , 22.6KHz ns  $p = 0.0668$ , 32.0KHz: ns  $p = 0.0544$  - unpaired t-test - *Pex1<sup>fl/fl</sup>* (grey,  $n = 17$ ), *VGlut3<sup>cre/cre</sup>Pex1<sup>fl/fl</sup>* (blue,  $n = 12$ )); (G-L) Wave I amplitude ( $\mu\text{V}$ ) as a function of ABRs Threshold (dB sounds pressure level (SPL)) of pure tones recording at 5.6 (G), 8.0 (H), 11.3 (I), 16.0 (J), 22.6 (K), and 32.0 KHz (L) at 4 months (table S18 - Mean  $\pm$  S.E.M. - 5.6KHz: \*\*\*  $p = 0.0007$ , 8.0KHz: \*\*  $p = 0.0014$ , 11.3KHz: \*\*  $p = 0.0028$ , 16.0KHz: \*\*  $p = 0.0040$ , 22.6KHz \*  $p = 0.0101$ , 32.0KHz: ns  $p = 0.0807$  - unpaired t-test - *Pex1<sup>fl/fl</sup>* (grey,  $n = 8$ ), *VGlut3<sup>cre/cre</sup>Pex1<sup>fl/fl</sup>* (blue,  $n = 9$ )). The solid line represents the simple linear regression.

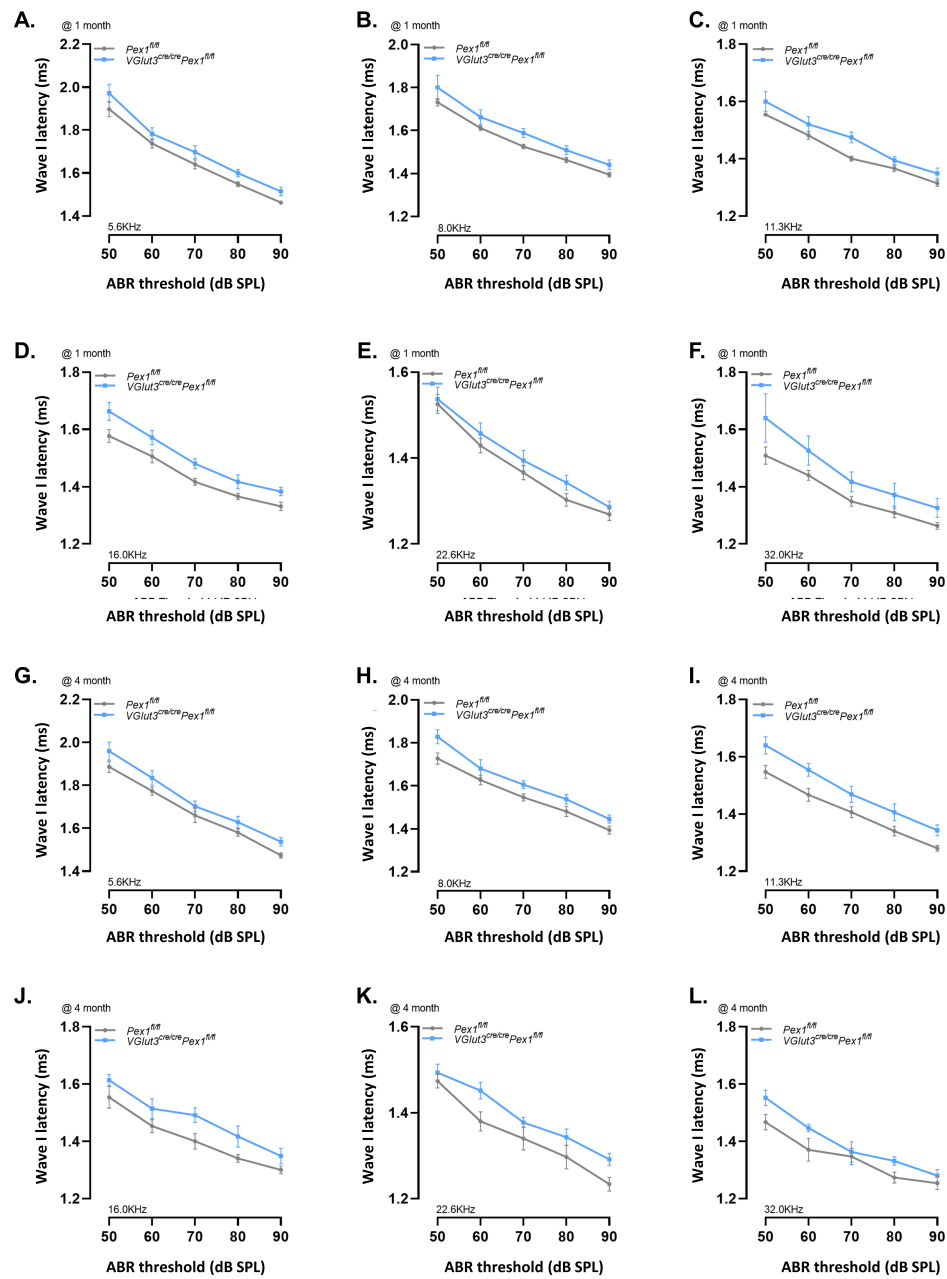

**Figure S5:** Slight elevation of the wave I latency measured on ABR recordings in *VGlut3<sup>cre/cre</sup>Pex1<sup>fl/fl</sup>* mice compared to control (*Pex1<sup>fl/fl</sup>*). (A-F) Wave I latency (ms) as a function of ABRs threshold (dB sounds pressure level (SPL)) of pure tones recording at 5.6 (A), 8.0 (B), 11.3 (C), 16.0 (D), 22.6 (E), and 32.0 KHz (F) at 1 month (*Pex1<sup>fl/fl</sup>* (grey)  $n = 17$ , *VGlut3<sup>cre/cre</sup>Pex1<sup>fl/fl</sup>* (blue)  $n = 12$ ; (G-L) Wave I latency (ms) as a function of ABRs threshold (dB sounds pressure level (SPL)) of pure tones recording at 5.6 (G), 8.0 (H), 11.3 (I), 16.0 (J), 22.6 (K), and 32.0 KHz (L) at 4 months (*Pex1<sup>fl/fl</sup>* (grey)  $n = 9$ , *VGlut3<sup>cre/cre</sup>Pex1<sup>fl/fl</sup>* (blue)  $n = 10$ ). Mean  $\pm$  S.E.M.

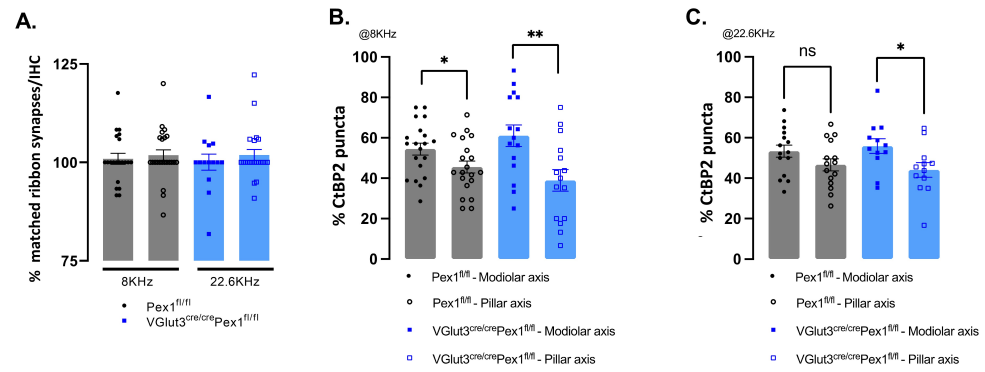

**Figure S6:** Unchanged distribution of ribbon synapses along Modiolar/Pillar axis in *VGlut3<sup>cre/cre</sup>Pex1<sup>fl/fl</sup>* compared to control mice (*Pex1<sup>fl/fl</sup>*)

(A) Percentage of matched ribbon synapses per IHC at 8 and 22.6 KHz (table S19 – at 8 KHz: ns  $p > 0.999$ ; *Pex1<sup>fl/fl</sup>* (mice:  $n = 6$  – IHC:  $n = 21$ ), *VGlut3<sup>cre/cre</sup>Pex1<sup>fl/fl</sup>* (mice:  $n = 6$  – IHC:  $n = 23$ ), at 22.6 KHz *Pex1<sup>fl/fl</sup>* (mice:  $n = 4$  – IHC:  $n = 14$ ), *VGlut3<sup>cre/cre</sup>Pex1<sup>fl/fl</sup>* (mice:  $n = 6$  – IHC:  $n = 22$ ) – 2way ANOVA Bonferroni's multicomparison test; (B-C) Percentage of CtBP2 puncta per IHC along the Modiolar/Pillar axis at 8 (B) and 22.6 KHz (C) (table S19; 8 KHz: *Pex1<sup>fl/fl</sup>* (mice:  $n = 5$  – IHC:  $n = 20$ ) \*  $p = 0.0420$ , *VGlut3<sup>cre/cre</sup>Pex1<sup>fl/fl</sup>* (mice:  $n = 4$  – IHC:  $n = 15$ ) \*\*  $p = 0.0066$  – 22.6KHz: *Pex1<sup>fl/fl</sup>* (mice:  $n = 5$  – IHC:  $n = 20$ ) ns  $p = 0.1272$ , *VGlut3<sup>cre/cre</sup>Pex1<sup>fl/fl</sup>* (mice:  $n = 4$  – IHC:  $n = 15$ ), \*  $p = 0.0320$ . unpaired t-test with Welch's correction). Mean  $\pm$  S.E.M.



# Table S1

## Figure 2A-D

| ABRs (db SPL)         |          |                  |                                                           |       |                    |
|-----------------------|----------|------------------|-----------------------------------------------------------|-------|--------------------|
| Pex1 <sup>fl/fl</sup> |          |                  | Gfi1 <sup>cre+</sup> Pex1 <sup>fl/fl</sup>                |       |                    |
| n                     | Mean     | S.E.M.           | n                                                         | Mean  | S.E.M.             |
| 1 month               | Click    | statistical test | 6                                                         | 44.17 | 2.71 12 44.58 1.30 |
|                       | 5.6 kHz  | statistical test | Mann-Whitney test, ns p=0.9334                            |       |                    |
|                       | 8 kHz    | statistical test | 6                                                         | 38.33 | 2.47 12 38.75 1.39 |
|                       | 11.3 kHz | statistical test | 2way ANOVA Bonferroni's multi-comparison test, ns P>0.999 |       |                    |
|                       | 16 kHz   | statistical test | 6                                                         | 32.50 | 1.71 12 35.83 1.72 |
|                       | 22.6 kHz | statistical test | 2way ANOVA Bonferroni's multi-comparison test, ns P>0.999 |       |                    |
|                       | 32 kHz   | statistical test | 6                                                         | 25.83 | 0.83 12 26.67 1.78 |
|                       |          |                  | 2way ANOVA Bonferroni's multi-comparison test, ns P=0.213 |       |                    |
|                       |          |                  | 6                                                         | 26.67 | 2.11 12 37.08 3.51 |
|                       |          |                  | 2way ANOVA Bonferroni's multi-comparison test, ns P=0.631 |       |                    |
| 4 months              | Click    | statistical test | 6                                                         | 40.00 | 2.24 12 53.75 5.61 |
|                       | 5.6 kHz  | statistical test | 2way ANOVA Bonferroni's multi-comparison test, * P=0.033  |       |                    |
|                       | 8 kHz    | statistical test | 8                                                         | 45.63 | 1.99 9 46.67 1.86  |
|                       | 11.3 kHz | statistical test | Mann-Whitney test, ns p=0.9638                            |       |                    |
|                       | 16 kHz   | statistical test | 8                                                         | 38.13 | 2.30 9 40.00 1.44  |
|                       | 22.6 kHz | statistical test | 2way ANOVA Bonferroni's multi-comparison test, ns P>0.999 |       |                    |
|                       | 32 kHz   | statistical test | 8                                                         | 35.63 | 4.38 9 36.67 1.44  |
|                       |          |                  | 2way ANOVA Bonferroni's multi-comparison test, ns P>0.999 |       |                    |
|                       |          |                  | 8                                                         | 27.50 | 1.34 9 32.33 1.47  |
|                       |          |                  | 2way ANOVA Bonferroni's multi-comparison test, ns P>0.999 |       |                    |

Table S2

Figure 2E-F

|          |          |                         | DPOAEs (dB SPL)                                          |       |        |                                                           |       |        |
|----------|----------|-------------------------|----------------------------------------------------------|-------|--------|-----------------------------------------------------------|-------|--------|
|          |          |                         | <i>Pex1</i> <sup>fl/fl</sup>                             |       |        | <i>Gfi1</i> <sup>cre/+</sup> <i>Pex1</i> <sup>fl/fl</sup> |       |        |
|          |          |                         | n                                                        | Mean  | S.E.M. | n                                                         | Mean  | S.E.M. |
| 1 month  | 5.6 kHz  | <i>statistical test</i> | 6                                                        | 50.83 | 5.07   | 12                                                        | 53.33 | 4.74   |
|          | 8 kHz    | <i>statistical test</i> | 6                                                        | 36.67 | 3.80   | 12                                                        | 39.58 | 3.17   |
|          | 11.3 kHz | <i>statistical test</i> | 6                                                        | 30.83 | 2.39   | 12                                                        | 31.25 | 2.76   |
|          | 16 kHz   | <i>statistical test</i> | 6                                                        | 27.50 | 2.81   | 12                                                        | 30.42 | 3.67   |
|          | 22.6 kHz | <i>statistical test</i> | 6                                                        | 38.33 | 3.58   | 12                                                        | 42.08 | 3.87   |
|          | 32 kHz   | <i>statistical test</i> | 6                                                        | 43.33 | 3.58   | 12                                                        | 54.58 | 4.90   |
|          | 45.2 kHz | <i>statistical test</i> | 6                                                        | 50.83 | 3.75   | 12                                                        | 63.75 | 4.85   |
|          |          |                         | 2way ANOVA Bonferroni's multicomparison test, ns P=0.312 |       |        |                                                           |       |        |
| 4 months | 5.6 kHz  | <i>statistical test</i> | 8                                                        | 48.75 | 4.20   | 9                                                         | 49.44 | 3.77   |
|          | 8 kHz    | <i>statistical test</i> | 8                                                        | 36.25 | 3.75   | 9                                                         | 39.44 | 2.82   |
|          | 11.3 kHz | <i>statistical test</i> | 8                                                        | 30.63 | 3.05   | 9                                                         | 30.56 | 3.48   |
|          | 16 kHz   | <i>statistical test</i> | 8                                                        | 29.38 | 2.58   | 9                                                         | 30.00 | 4.25   |
|          | 22.6 kHz | <i>statistical test</i> | 8                                                        | 43.75 | 6.03   | 9                                                         | 47.79 | 5.15   |
|          | 32 kHz   | <i>statistical test</i> | 8                                                        | 58.13 | 6.94   | 9                                                         | 66.11 | 5.32   |
|          | 45.2 kHz | <i>statistical test</i> | 8                                                        | 65.63 | 5.38   | 9                                                         | 78.89 | 5.12   |
|          |          |                         | 2way ANOVA Bonferroni's multicomparison test, ns P=0.300 |       |        |                                                           |       |        |

Table S3

Figure 2I -J

|          |          |                         | Wave I amplitude (μV)                                       |      |        |                                                           |      |        |
|----------|----------|-------------------------|-------------------------------------------------------------|------|--------|-----------------------------------------------------------|------|--------|
|          |          |                         | <i>Pex1</i> <sup>fl/fl</sup>                                |      |        | <i>Gfi1</i> <sup>cre/+</sup> <i>Pex1</i> <sup>fl/fl</sup> |      |        |
|          |          |                         | n                                                           | Mean | S.E.M. | n                                                         | Mean | S.E.M. |
| 1 month  | 5.6 kHz  | <i>statistical test</i> | 6                                                           | 1.35 | 0.14   | 12                                                        | 0.73 | 0.09   |
|          |          |                         | unpaired t-test with Welch's correction, <b>** P=0.0054</b> |      |        |                                                           |      |        |
|          | 8 kHz    | <i>statistical test</i> | 6                                                           | 1.71 | 0.22   | 12                                                        | 1.01 | 0.09   |
|          |          |                         | unpaired t-test with Welch's correction, <b>* P=0.0235</b>  |      |        |                                                           |      |        |
|          | 11.3 kHz | <i>statistical test</i> | 6                                                           | 2.37 | 0.22   | 12                                                        | 1.47 | 0.14   |
|          |          |                         | unpaired t-test with Welch's correction, <b>** P=0.0064</b> |      |        |                                                           |      |        |
| 4 months | 16 kHz   | <i>statistical test</i> | 6                                                           | 1.89 | 0.20   | 12                                                        | 1.10 | 0.12   |
|          |          |                         | unpaired t-test with Welch's correction, <b>** P=0.0084</b> |      |        |                                                           |      |        |
|          | 22.6 kHz | <i>statistical test</i> | 6                                                           | 1.79 | 0.17   | 12                                                        | 1.04 | 0.14   |
|          |          |                         | unpaired t-test with Welch's correction, <b>** P=0.0049</b> |      |        |                                                           |      |        |
|          | 32 kHz   | <i>statistical test</i> | 6                                                           | 1.14 | 0.13   | 12                                                        | 0.62 | 0.10   |
|          |          |                         | unpaired t-test with Welch's correction, <b>* P=0.0109</b>  |      |        |                                                           |      |        |
| 4 months | 5.6 kHz  | <i>statistical test</i> | 8                                                           | 0.91 | 0.09   | 9                                                         | 0.51 | 0.06   |
|          |          |                         | unpaired t-test with Welch's correction, <b>** P=0.0034</b> |      |        |                                                           |      |        |
|          | 8 kHz    | <i>statistical test</i> | 8                                                           | 1.08 | 0.14   | 9                                                         | 0.62 | 0.06   |
|          |          |                         | unpaired t-test with Welch's correction, <b>* P=0.0144</b>  |      |        |                                                           |      |        |
|          | 11.3 kHz | <i>statistical test</i> | 8                                                           | 1.47 | 0.14   | 9                                                         | 0.89 | 0.10   |
|          |          |                         | unpaired t-test with Welch's correction, <b>** P=0.0042</b> |      |        |                                                           |      |        |
| 4 months | 16 kHz   | <i>statistical test</i> | 8                                                           | 1.23 | 0.12   | 9                                                         | 0.81 | 0.12   |
|          |          |                         | unpaired t-test with Welch's correction, <b>* P=0.0293</b>  |      |        |                                                           |      |        |
|          | 22.6 kHz | <i>statistical test</i> | 8                                                           | 0.90 | 0.18   | 8                                                         | 0.72 | 0.12   |
|          |          |                         | unpaired t-test with Welch's correction, ns P=0.4393        |      |        |                                                           |      |        |
| 4 months | 32 kHz   | <i>statistical test</i> | 8                                                           | 1.06 | 0.10   | 9                                                         | 0.96 | 0.07   |
|          |          |                         | unpaired t-test with Welch's correction, ns P=0.4436        |      |        |                                                           |      |        |

Table S4

Figure 2K-L

|          |          |                         | Wave I latency (ms)                                                |      |        |                                                           |      |        |
|----------|----------|-------------------------|--------------------------------------------------------------------|------|--------|-----------------------------------------------------------|------|--------|
|          |          |                         | <i>Pex1</i> <sup>fl/fl</sup>                                       |      |        | <i>Gfi1</i> <sup>cre/+</sup> <i>Pex1</i> <sup>fl/fl</sup> |      |        |
|          |          |                         | n                                                                  | Mean | S.E.M. | n                                                         | Mean | S.E.M. |
| 1 month  | 5.6 kHz  | <i>statistical test</i> | 6                                                                  | 1.54 | 0.02   | 12                                                        | 1.61 | 0.02   |
|          |          |                         | unpaired t-test with Welch's correction, * <b><u>P=0.0341</u></b>  |      |        |                                                           |      |        |
|          | 8 kHz    | <i>statistical test</i> | 6                                                                  | 1.48 | 0.02   | 12                                                        | 1.55 | 0.02   |
|          |          |                         | unpaired t-test with Welch's correction, * <b><u>P=0.0196</u></b>  |      |        |                                                           |      |        |
|          | 11.3 kHz | <i>statistical test</i> | 6                                                                  | 1.38 | 0.02   | 12                                                        | 1.44 | 0.02   |
|          |          |                         | unpaired t-test with Welch's correction, * <b><u>P=0.0451</u></b>  |      |        |                                                           |      |        |
| 4 months | 16 kHz   | <i>statistical test</i> | 6                                                                  | 1.37 | 0.03   | 12                                                        | 1.46 | 0.03   |
|          |          |                         | unpaired t-test with Welch's correction, ns P=0.0502               |      |        |                                                           |      |        |
|          | 22.6 kHz | <i>statistical test</i> | 6                                                                  | 1.31 | 0.02   | 12                                                        | 1.39 | 0.03   |
|          |          |                         | unpaired t-test with Welch's correction, * <b><u>P=0.0417</u></b>  |      |        |                                                           |      |        |
|          | 32 kHz   | <i>statistical test</i> | 6                                                                  | 1.31 | 0.02   | 10                                                        | 1.39 | 0.03   |
|          |          |                         | unpaired t-test with Welch's correction, ns P=0.0807               |      |        |                                                           |      |        |
| 4 months | 5.6 kHz  | <i>statistical test</i> | 8                                                                  | 1.55 | 0.02   | 9                                                         | 1.61 | 0.02   |
|          |          |                         | unpaired t-test with Welch's correction, * <b><u>P=0.0261</u></b>  |      |        |                                                           |      |        |
|          | 8 kHz    | <i>statistical test</i> | 8                                                                  | 1.48 | 0.01   | 9                                                         | 1.58 | 0.21   |
|          |          |                         | unpaired t-test with Welch's correction, ** <b><u>P=0.0034</u></b> |      |        |                                                           |      |        |
|          | 11.3 kHz | <i>statistical test</i> | 8                                                                  | 1.37 | 0.02   | 9                                                         | 1.46 | 0.02   |
|          |          |                         | unpaired t-test with Welch's correction, ** <b><u>P=0.0024</u></b> |      |        |                                                           |      |        |
| 4 months | 16 kHz   | <i>statistical test</i> | 8                                                                  | 1.36 | 0.03   | 9                                                         | 1.44 | 0.03   |
|          |          |                         | unpaired t-test with Welch's correction, ns P=0.0547               |      |        |                                                           |      |        |
|          | 22.6 kHz | <i>statistical test</i> | 8                                                                  | 1.40 | 0.07   | 8                                                         | 1.39 | 0.03   |
|          |          |                         | unpaired t-test with Welch's correction, ns P=0.8970               |      |        |                                                           |      |        |
|          | 32 kHz   | <i>statistical test</i> | 5                                                                  | 1.34 | 0.05   | 6                                                         | 1.57 | 0.12   |
|          |          |                         | unpaired t-test with Welch's correction, ns P=0.1122               |      |        |                                                           |      |        |

Table S5

Figure 3A-D

|          |          |                         | ABRs (db SPL)                                                              |       |        |                                                               |       |        |
|----------|----------|-------------------------|----------------------------------------------------------------------------|-------|--------|---------------------------------------------------------------|-------|--------|
|          |          |                         | <i>Pex1</i> <sup>fl/fl</sup>                                               |       |        | <i>VGlut3</i> <sup>cre/cre</sup> <i>Pex1</i> <sup>fl/fl</sup> |       |        |
|          |          |                         | n                                                                          | Mean  | S.E.M. | n                                                             | Mean  | S.E.M. |
| 1 month  | Click    | <i>statistical test</i> | 17                                                                         | 45.29 | 1.09   | 12                                                            | 47.92 | 1.56   |
|          |          |                         | <i>Mann-Whitney test, ns p=0.2243</i>                                      |       |        |                                                               |       |        |
|          | 5.6 kHz  | <i>statistical test</i> | 17                                                                         | 30.59 | 1.28   | 12                                                            | 43.33 | 3.45   |
|          |          |                         | 2way ANOVA Bonferroni's multicomparison test, **** <b><u>P=0.00007</u></b> |       |        |                                                               |       |        |
|          | 8 kHz    | <i>statistical test</i> | 17                                                                         | 28.24 | 1.13   | 12                                                            | 37.08 | 3.40   |
|          |          |                         | 2way ANOVA Bonferroni's multicomparison test, * <b><u>P=0.01236</u></b>    |       |        |                                                               |       |        |
|          | 11.3 kHz | <i>statistical test</i> | 17                                                                         | 23.82 | 0.68   | 12                                                            | 28.75 | 2.23   |
|          |          |                         | 2way ANOVA Bonferroni's multicomparison test, ns P=0.4983                  |       |        |                                                               |       |        |
| 4 months | 16 kHz   | <i>statistical test</i> | 17                                                                         | 23.24 | 2.39   | 12                                                            | 29.58 | 2.78   |
|          |          |                         | 2way ANOVA Bonferroni's multicomparison test, ns P=0.1559                  |       |        |                                                               |       |        |
|          | 22.6 kHz | <i>statistical test</i> | 17                                                                         | 29.71 | 0.91   | 12                                                            | 35.42 | 2.17   |
|          |          |                         | 2way ANOVA Bonferroni's multicomparison test, ns P=0.2691                  |       |        |                                                               |       |        |
|          | 32 kHz   | <i>statistical test</i> | 17                                                                         | 38.53 | 1.41   | 11                                                            | 42.27 | 1.95   |
|          |          |                         | 2way ANOVA Bonferroni's multicomparison test, ns P>0.999                   |       |        |                                                               |       |        |
|          | Click    | <i>statistical test</i> | 10                                                                         | 43.00 | 1.53   | 9                                                             | 46.11 | 1.39   |
|          |          |                         | <i>Mann-Whitney test, ns p=0.2962</i>                                      |       |        |                                                               |       |        |
| 4 months | 5.6 kHz  | <i>statistical test</i> | 10                                                                         | 35.20 | 1.86   | 9                                                             | 41.11 | 3.71   |
|          |          |                         | 2way ANOVA Bonferroni's multicomparison test, ns P=0.1421                  |       |        |                                                               |       |        |
|          | 8 kHz    | <i>statistical test</i> | 10                                                                         | 29.00 | 1.80   | 9                                                             | 39.44 | 4.12   |
|          |          |                         | 2way ANOVA Bonferroni's multicomparison test, * <b><u>P=0.0382</u></b>     |       |        |                                                               |       |        |
|          | 11.3 kHz | <i>statistical test</i> | 10                                                                         | 23.50 | 1.50   | 9                                                             | 33.33 | 2.76   |
|          |          |                         | 2way ANOVA Bonferroni's multicomparison test, ns P=0.0604                  |       |        |                                                               |       |        |
|          | 16 kHz   | <i>statistical test</i> | 10                                                                         | 26.50 | 2.69   | 9                                                             | 37.78 | 3.45   |
|          |          |                         | 2way ANOVA Bonferroni's multicomparison test, * <b><u>P=0.0199</u></b>     |       |        |                                                               |       |        |
| 4 months | 22.6 kHz | <i>statistical test</i> | 10                                                                         | 31.00 | 1.45   | 9                                                             | 38.89 | 2.32   |
|          |          |                         | 2way ANOVA Bonferroni's multicomparison test, ns P=0.2271                  |       |        |                                                               |       |        |
|          | 32 kHz   | <i>statistical test</i> | 10                                                                         | 41.00 | 2.77   | 9                                                             | 46.67 | 2.64   |
|          |          |                         | 2way ANOVA Bonferroni's multicomparison test, ns P=0.8029                  |       |        |                                                               |       |        |

Table S6

Figure 3E-F

|          |          |                         | DPOAEs (dB SPL)                                           |       |        |                                                               |       |        |
|----------|----------|-------------------------|-----------------------------------------------------------|-------|--------|---------------------------------------------------------------|-------|--------|
|          |          |                         | <i>Pex1</i> <sup>fl/fl</sup>                              |       |        | <i>VGlut3</i> <sup>cre/cre</sup> <i>Pex1</i> <sup>fl/fl</sup> |       |        |
|          |          |                         | n                                                         | Mean  | S.E.M. | n                                                             | Mean  | S.E.M. |
| 1 month  | 5.6 kHz  | <i>statistical test</i> | 17                                                        | 54.12 | 3.04   | 12                                                            | 60.83 | 2.81   |
|          |          |                         | 2way ANOVA Bonferroni's multicomparison test, ns P=0.5657 |       |        |                                                               |       |        |
|          | 8 kHz    | <i>statistical test</i> | 17                                                        | 40.88 | 1.62   | 12                                                            | 45.83 | 4.52   |
|          |          |                         | 2way ANOVA Bonferroni's multicomparison test, ns P>0.999  |       |        |                                                               |       |        |
|          | 11.3 kHz | <i>statistical test</i> | 17                                                        | 31.47 | 1.41   | 12                                                            | 34.58 | 3.67   |
|          |          |                         | 2way ANOVA Bonferroni's multicomparison test, ns P>0.999  |       |        |                                                               |       |        |
|          | 16 kHz   | <i>statistical test</i> | 17                                                        | 30.59 | 1.28   | 12                                                            | 32.50 | 2.58   |
| 4 months |          |                         | 2way ANOVA Bonferroni's multicomparison test, ns P>0.999  |       |        |                                                               |       |        |
|          | 22.6 kHz | <i>statistical test</i> | 17                                                        | 40.00 | 2.01   | 12                                                            | 42.92 | 2.66   |
|          |          |                         | 2way ANOVA Bonferroni's multicomparison test, ns P>0.999  |       |        |                                                               |       |        |
|          | 32 kHz   | <i>statistical test</i> | 17                                                        | 46.76 | 2.14   | 12                                                            | 52.50 | 3.62   |
|          |          |                         | 2way ANOVA Bonferroni's multicomparison test, ns P=0.9486 |       |        |                                                               |       |        |
|          | 45.2 kHz | <i>statistical test</i> | 17                                                        | 52.06 | 2.68   | 12                                                            | 57.50 | 3.82   |
|          |          |                         | 2way ANOVA Bonferroni's multicomparison test, ns P>0.999  |       |        |                                                               |       |        |
| 4 months | 5.6 kHz  | <i>statistical test</i> | 10                                                        | 51.00 | 2.56   | 9                                                             | 48.89 | 4.06   |
|          |          |                         | 2way ANOVA Bonferroni's multicomparison test, ns P>0.999  |       |        |                                                               |       |        |
|          | 8 kHz    | <i>statistical test</i> | 10                                                        | 37.00 | 2.38   | 9                                                             | 34.44 | 3.86   |
|          |          |                         | 2way ANOVA Bonferroni's multicomparison test, ns P>0.999  |       |        |                                                               |       |        |
|          | 11.3 kHz | <i>statistical test</i> | 10                                                        | 28.50 | 2.24   | 9                                                             | 30.56 | 2.56   |
|          |          |                         | 2way ANOVA Bonferroni's multicomparison test, ns P>0.999  |       |        |                                                               |       |        |
|          | 16 kHz   | <i>statistical test</i> | 10                                                        | 28.00 | 2.00   | 9                                                             | 30.56 | 2.82   |
| 4 months |          |                         | 2way ANOVA Bonferroni's multicomparison test, ns P>0.999  |       |        |                                                               |       |        |
|          | 22.6 kHz | <i>statistical test</i> | 10                                                        | 41.50 | 2.24   | 9                                                             | 41.11 | 3.51   |
|          |          |                         | 2way ANOVA Bonferroni's multicomparison test, ns P>0.999  |       |        |                                                               |       |        |
|          | 32 kHz   | <i>statistical test</i> | 10                                                        | 52.00 | 3.09   | 9                                                             | 45.00 | 4.00   |
|          |          |                         | 2way ANOVA Bonferroni's multicomparison test, ns P=0.8351 |       |        |                                                               |       |        |
|          | 45.2 kHz | <i>statistical test</i> | 10                                                        | 55.00 | 3.87   | 9                                                             | 51.67 | 4.25   |
|          |          |                         | 2way ANOVA Bonferroni's multicomparison test, ns P>0.999  |       |        |                                                               |       |        |

Table S7

Figure 4C-D

|          |          |                         | Wave I amplitude ( $\mu$ V)                             |      |        |                                                               |      |        |
|----------|----------|-------------------------|---------------------------------------------------------|------|--------|---------------------------------------------------------------|------|--------|
|          |          |                         | <i>Pex1</i> <sup>fl/fl</sup>                            |      |        | <i>VGlut3</i> <sup>cre/cre</sup> <i>Pex1</i> <sup>fl/fl</sup> |      |        |
|          |          |                         | n                                                       | Mean | S.E.M. | n                                                             | Mean | S.E.M. |
| 1 month  | Click    | <i>statistical test</i> | 7                                                       | 3.39 | 0.31   | 7                                                             | 2.55 | 0.32   |
|          |          |                         | unpaired t-test with Welch's correction, ns $P=0.0842$  |      |        |                                                               |      |        |
|          | 5.6 kHz  | <i>statistical test</i> | 7                                                       | 1.29 | 0.11   | 7                                                             | 0.79 | 0.05   |
|          |          |                         | unpaired t-test with Welch's correction, ** $P=0.0028$  |      |        |                                                               |      |        |
|          | 8 kHz    | <i>statistical test</i> | 7                                                       | 1.78 | 0.10   | 7                                                             | 1.18 | 0.09   |
|          |          |                         | unpaired t-test with Welch's correction, *** $P=0.0009$ |      |        |                                                               |      |        |
|          | 11.3 kHz | <i>statistical test</i> | 7                                                       | 2.28 | 0.15   | 7                                                             | 1.37 | 0.13   |
| 4 months |          |                         | unpaired t-test with Welch's correction, *** $P=0.0007$ |      |        |                                                               |      |        |
|          | 16 kHz   | <i>statistical test</i> | 7                                                       | 1.62 | 0.18   | 7                                                             | 1.00 | 0.04   |
|          |          |                         | unpaired t-test with Welch's correction, * $P=0.0141$   |      |        |                                                               |      |        |
|          | 22.6 kHz | <i>statistical test</i> | 7                                                       | 1.62 | 0.13   | 7                                                             | 0.97 | 0.04   |
|          |          |                         | unpaired t-test with Welch's correction, ** $P=0.0022$  |      |        |                                                               |      |        |
|          | 32 kHz   | <i>statistical test</i> | 7                                                       | 1.16 | 0.15   | 7                                                             | 0.69 | 0.05   |
|          |          |                         | unpaired t-test with Welch's correction, * $P=0.0213$   |      |        |                                                               |      |        |
| 4 months | Click    | <i>statistical test</i> | 6                                                       | 2.65 | 0.17   | 7                                                             | 1.05 | 0.03   |
|          |          |                         | unpaired t-test with Welch's correction, *** $P=0.0002$ |      |        |                                                               |      |        |
|          | 5.6 kHz  | <i>statistical test</i> | 6                                                       | 0.68 | 0.06   | 7                                                             | 0.39 | 0.02   |
|          |          |                         | unpaired t-test with Welch's correction, * $P=0.0048$   |      |        |                                                               |      |        |
|          | 8 kHz    | <i>statistical test</i> | 6                                                       | 1.03 | 0.06   | 7                                                             | 0.63 | 0.04   |
|          |          |                         | unpaired t-test with Welch's correction, *** $P=0.0002$ |      |        |                                                               |      |        |
|          | 11.3 kHz | <i>statistical test</i> | 6                                                       | 1.53 | 0.12   | 7                                                             | 0.75 | 0.03   |
| 4 months |          |                         | unpaired t-test with Welch's correction, *** $P=0.0009$ |      |        |                                                               |      |        |
|          | 16 kHz   | <i>statistical test</i> | 6                                                       | 1.02 | 0.11   | 7                                                             | 0.55 | 0.04   |
|          |          |                         | unpaired t-test with Welch's correction, ** $P=0.0069$  |      |        |                                                               |      |        |
|          | 22.6 kHz | <i>statistical test</i> | 6                                                       | 1.09 | 0.10   | 7                                                             | 0.60 | 0.04   |
|          |          |                         | unpaired t-test with Welch's correction, ** $P=0.0036$  |      |        |                                                               |      |        |
|          | 32 kHz   | <i>statistical test</i> | 6                                                       | 0.68 | 0.07   | 7                                                             | 0.45 | 0.04   |
|          |          |                         | unpaired t-test with Welch's correction, * $P=0.0368$   |      |        |                                                               |      |        |

Table S8

Figure 4E-F

|          |          |                         | Wave I latency (ms)          |                                      |        |                                                               |      |        |
|----------|----------|-------------------------|------------------------------|--------------------------------------|--------|---------------------------------------------------------------|------|--------|
|          |          |                         | <i>Pex1</i> <sup>fl/fl</sup> |                                      |        | <i>VGlut3</i> <sup>cre/cre</sup> <i>Pex1</i> <sup>fl/fl</sup> |      |        |
|          |          |                         | n                            | Mean                                 | S.E.M. | n                                                             | Mean | S.E.M. |
| 1 month  | Click    | <i>statistical test</i> | 7                            | 1.16                                 | 0.01   | 7                                                             | 1.17 | 0.01   |
|          |          |                         |                              | Mann-Whitney test, ns P=0.9825       |        |                                                               |      |        |
|          | 5.6 kHz  | <i>statistical test</i> | 7                            | 1.55                                 | 0.01   | 7                                                             | 1.60 | 0.02   |
|          |          |                         |                              | Mann-Whitney test, * <u>p=0.0210</u> |        |                                                               |      |        |
|          | 8 kHz    | <i>statistical test</i> | 7                            | 1.46                                 | 0.01   | 7                                                             | 1.51 | 0.02   |
|          |          |                         |                              | Mann-Whitney test, * <u>p=0.0390</u> |        |                                                               |      |        |
|          | 11.3 kHz | <i>statistical test</i> | 7                            | 1.37                                 | 0.01   | 7                                                             | 1.41 | 0.02   |
|          |          |                         |                              | Mann-Whitney test, * <u>p=0.0175</u> |        |                                                               |      |        |
| 4 months | 16 kHz   | <i>statistical test</i> | 7                            | 1.37                                 | 0.01   | 7                                                             | 1.43 | 0.02   |
|          |          |                         |                              | Mann-Whitney test, * <u>p=0.0146</u> |        |                                                               |      |        |
|          | 22.6 kHz | <i>statistical test</i> | 7                            | 1.31                                 | 0.01   | 7                                                             | 1.34 | 0.02   |
|          |          |                         |                              | Mann-Whitney test, ns p=0.2978       |        |                                                               |      |        |
|          | 32 kHz   | <i>statistical test</i> | 7                            | 1.31                                 | 0.01   | 7                                                             | 1.34 | 0.02   |
|          |          |                         |                              | Mann-Whitney test, ns p=0.2477       |        |                                                               |      |        |
|          | Click    | <i>statistical test</i> | 6                            | 1.12                                 | 0.02   | 7                                                             | 1.18 | 0.04   |
|          |          |                         |                              | Mann-Whitney test, ns P=0.3415       |        |                                                               |      |        |
| 4 months | 5.6 kHz  | <i>statistical test</i> | 6                            | 1.57                                 | 0.02   | 7                                                             | 1.62 | 0.02   |
|          |          |                         |                              | Mann-Whitney test, ns p=0.0822       |        |                                                               |      |        |
|          | 8 kHz    | <i>statistical test</i> | 6                            | 1.47                                 | 0.02   | 7                                                             | 1.53 | 0.02   |
|          |          |                         |                              | Mann-Whitney test, ns p=0.0629       |        |                                                               |      |        |
|          | 11.3 kHz | <i>statistical test</i> | 6                            | 1.34                                 | 0.02   | 7                                                             | 1.41 | 0.02   |
|          |          |                         |                              | Mann-Whitney test, ns p=0.0565       |        |                                                               |      |        |
|          | 16 kHz   | <i>statistical test</i> | 6                            | 1.35                                 | 0.02   | 7                                                             | 1.42 | 0.03   |
|          |          |                         |                              | Mann-Whitney test, ns p=0.0542       |        |                                                               |      |        |
| 4 months | 22.6 kHz | <i>statistical test</i> | 6                            | 1.29                                 | 0.02   | 7                                                             | 1.34 | 0.01   |
|          |          |                         |                              | Mann-Whitney test, ns p=0.1241       |        |                                                               |      |        |
| 4 months | 32 kHz   | <i>statistical test</i> | 6                            | 1.29                                 | 0.02   | 7                                                             | 1.32 | 0.02   |
|          |          |                         |                              | Mann-Whitney test, ns p=0.3910       |        |                                                               |      |        |



## Table S9

Figure 4K-L

|          |       |                         | Wave IV amplitude ( $\mu$ V)                                      |      |        |                                                               |      |        |
|----------|-------|-------------------------|-------------------------------------------------------------------|------|--------|---------------------------------------------------------------|------|--------|
|          |       |                         | <i>Pex1</i> <sup>fl/fl</sup>                                      |      |        | <i>VGlut3</i> <sup>cre/cre</sup> <i>Pex1</i> <sup>fl/fl</sup> |      |        |
|          |       |                         | n                                                                 | Mean | S.E.M. | n                                                             | Mean | S.E.M. |
| 1 month  | Click | <i>statistical test</i> | 7                                                                 | 2.31 | 0.19   | 7                                                             | 1.80 | 0.21   |
|          |       |                         | unpaired t-test with Welch's correction, ns P=0.0943              |      |        |                                                               |      |        |
| 4 months | Click | <i>statistical test</i> | 6                                                                 | 1.90 | 0.22   | 7                                                             | 1.18 | 0.14   |
|          |       |                         | unpaired t-test with Welch's correction, * <b><u>P=0.0217</u></b> |      |        |                                                               |      |        |

# Table S10

Figure 4M -N

|          |       |                         | Wave IV latency (ms)                                  |        |      |                                                               |        |      |
|----------|-------|-------------------------|-------------------------------------------------------|--------|------|---------------------------------------------------------------|--------|------|
|          |       |                         | <i>Pex1</i> <sup>fl/fl</sup>                          |        |      | <i>VGlut3</i> <sup>cre/cre</sup> <i>Pex1</i> <sup>fl/fl</sup> |        |      |
|          |       |                         | Mean                                                  | S.E.M. |      | Mean                                                          | S.E.M. |      |
| 1 month  | Click | <i>statistical test</i> | 7                                                     | 3.76   | 0.04 | 7                                                             | 3.74   | 0.03 |
|          |       |                         | unpaired t-test with Welch's correction, ns P=0.8269  |        |      |                                                               |        |      |
| 4 months | Click | <i>statistical test</i> | 6                                                     | 3.47   | 0.05 | 7                                                             | 3.55   | 0.07 |
|          |       |                         | unpaired t-test with Welch's correction, ns P =0.1346 |        |      |                                                               |        |      |

# Table S11

Figure 4O-P

|          |       |                         | ratio wave IV/I amplitude                                          |        |      |                                                               |        |      |
|----------|-------|-------------------------|--------------------------------------------------------------------|--------|------|---------------------------------------------------------------|--------|------|
|          |       |                         | <i>Pex1</i> <sup>fl/fl</sup>                                       |        |      | <i>VGlut3</i> <sup>cre/cre</sup> <i>Pex1</i> <sup>fl/fl</sup> |        |      |
|          |       |                         | Mean                                                               | S.E.M. |      | Mean                                                          | S.E.M. |      |
| 1 month  | Click | <i>statistical test</i> | 7                                                                  | 0.73   | 0.10 | 7                                                             | 0.73   | 0.09 |
|          |       |                         | unpaired t-test with Welch's correction, ns P=0.9839               |        |      |                                                               |        |      |
| 4 months | Click | <i>statistical test</i> | 6                                                                  | 0.74   | 0.10 | 7                                                             | 1.11   | 0.10 |
|          |       |                         | unpaired t-test with Welch's correction, * <b><u>P =0.0288</u></b> |        |      |                                                               |        |      |

**Figure 5C-F**

|          |                         | CtBP2 puncta/IHC               |         |       |        |                                                               |         |       |        |
|----------|-------------------------|--------------------------------|---------|-------|--------|---------------------------------------------------------------|---------|-------|--------|
|          |                         | <i>Pex1</i> <sup>fl/fl</sup>   |         |       |        | <i>VGlut3</i> <sup>cre/cre</sup> <i>Pex1</i> <sup>fl/fl</sup> |         |       |        |
|          |                         | n (mice)                       | n (IHC) | Mean  | S.E.M. | n (mice)                                                      | n (IHC) | Mean  | S.E.M. |
| 8 kHz    | <i>statistical test</i> | 6                              | 23      | 14.43 | 0.51   | 6                                                             | 23      | 14.35 | 0.39   |
|          |                         | Mann-Whitney test, ns P=0.9513 |         |       |        |                                                               |         |       |        |
| 22.6 kHz | <i>statistical test</i> | 5                              | 15      | 19.81 | 0.67   | 5                                                             | 19      | 18.05 | 0.55   |
|          |                         | Mann-Whitney test, ns P=0.0796 |         |       |        |                                                               |         |       |        |

  

|          |                         | GluR2 puncta/IHC               |         |       |        |                                                               |         |       |        |
|----------|-------------------------|--------------------------------|---------|-------|--------|---------------------------------------------------------------|---------|-------|--------|
|          |                         | <i>Pex1</i> <sup>fl/fl</sup>   |         |       |        | <i>VGlut3</i> <sup>cre/cre</sup> <i>Pex1</i> <sup>fl/fl</sup> |         |       |        |
|          |                         | n (mice)                       | n (IHC) | Mean  | S.E.M. | n (mice)                                                      | n (IHC) | Mean  | S.E.M. |
| 8 kHz    | <i>statistical test</i> | 6                              | 23      | 14.70 | 0.54   | 6                                                             | 23      | 14.61 | 0.45   |
|          |                         | Mann-Whitney test, ns P=0.9866 |         |       |        |                                                               |         |       |        |
| 22.6 kHz | <i>statistical test</i> | 4                              | 14      | 20.07 | 0.63   | 5                                                             | 19      | 18.26 | 0.61   |
|          |                         | Mann-Whitney test, ns P=0.0524 |         |       |        |                                                               |         |       |        |

Table S13

Figure 5G-H

|          |                         | Ribbon synapses volume ( $\mu\text{m}^3$ ) |            |      |        |                                                               |            |      |        |
|----------|-------------------------|--------------------------------------------|------------|------|--------|---------------------------------------------------------------|------------|------|--------|
|          |                         | <i>Pex1</i> <sup>fl/fl</sup>               |            |      |        | <i>VGlut3</i> <sup>cre/cre</sup> <i>Pex1</i> <sup>fl/fl</sup> |            |      |        |
|          |                         | n (mice)                                   | n (ribbon) | Mean | S.E.M. | n (mice)                                                      | n (ribbon) | Mean | S.E.M. |
| 8 kHz    | <i>statistical test</i> | 6                                          | 282        | 0.49 | 0.03   | 6                                                             | 311        | 0.32 | 0.02   |
|          |                         | Mann-Whitney test, **** P<0.0001           |            |      |        |                                                               |            |      |        |
| 22.6 kHz | <i>statistical test</i> | 5                                          | 286        | 0.52 | 0.02   | 5                                                             | 328        | 0.31 | 0.02   |
|          |                         | Mann-Whitney test, **** P<0.0001           |            |      |        |                                                               |            |      |        |

Figure 5I-J

|          |          | % of CtBP2 punta             |         |            |       |                                                               |         |            |       |
|----------|----------|------------------------------|---------|------------|-------|---------------------------------------------------------------|---------|------------|-------|
|          |          | <i>Pex1</i> <sup>fl/fl</sup> |         |            |       | <i>VGlut3</i> <sup>cre/cre</sup> <i>Pex1</i> <sup>fl/fl</sup> |         |            |       |
|          |          | n (mice)                     | n (IHC) | n (ribbon) | Mean  | n (mice)                                                      | n (IHC) | n (ribbon) | Mean  |
| 8 KHz    | 0-0.25   |                              |         |            | 37.23 |                                                               |         |            | 53.05 |
|          | 0.25-0.5 |                              |         |            | 27.30 |                                                               |         |            | 28.30 |
|          | 0.5-1    |                              |         |            | 23.05 |                                                               |         |            | 14.79 |
|          | 1-1.5    | 5                            | 25      | 282        | 9.22  | 6                                                             | 22      | 311        | 2.57  |
|          | 1.5-2    |                              |         |            | 1.77  |                                                               |         |            | 0.96  |
|          | >2       |                              |         |            | 1.42  |                                                               |         |            | 0.32  |
| 22.6 kHz | 0-0.25   |                              |         |            | 26.57 |                                                               |         |            | 60.98 |
|          | 0.25-0.5 |                              |         |            | 32.52 |                                                               |         |            | 18.29 |
|          | 0.5-1    |                              |         |            | 32.17 |                                                               |         |            | 13.41 |
|          | 1-1.5    | 5                            | 15      | 286        | 5.94  | 6                                                             | 19      | 328        | 2.49  |
|          | 1.5-2    |                              |         |            | 1.75  |                                                               |         |            | 1.83  |
|          | >2       |                              |         |            | 1.05  |                                                               |         |            | 0     |

Table S14

Figure 6

|                  |                        |                                       | <i>Pex1<sup>fl/fl</sup></i> |            |          | <i>VGlut3<sup>cre/cre</sup> Pex1<sup>fl/fl</sup></i> |            |          |                                           |     |
|------------------|------------------------|---------------------------------------|-----------------------------|------------|----------|------------------------------------------------------|------------|----------|-------------------------------------------|-----|
|                  |                        |                                       | n                           | Mean       | ± S.E.M. | n                                                    | Mean       | ± S.E.M. | Significant                               |     |
| Ca <sup>2+</sup> | Ramp calcique          | Vhalf (mV)                            | 17                          | -21.3657   | 0.66931  | 21                                                   | -21.27     | 0.68504  | unpaired t-test : 0,93                    | ns  |
|                  |                        | I <sub>Ca<sup>2+</sup></sub> max (pA) | 14                          | -138.85714 | 6.28521  | 17                                                   | -118.41176 | 5,88684  | unpaired t-test : 0,025                   | *   |
|                  | Resting cell size (pF) |                                       | 17                          | 10,82647□  | 0.35056  | 21                                                   | 10.48571   | 0.3155   | unpaired t-test : 0,47                    | ns  |
|                  | Exocytosis             | RRP (kinetics) curve                  | 10                          |            |          | 15                                                   |            |          | two-way anova / factor phenotype : 7,6E-8 | *** |
|                  |                        | 100ms stimulation (sustained, fF)     | 14                          | 26,92857□  | 3.25722  | 17                                                   | 15,92941   | 2.10833  | Unpaired t-test : 0,00656                 | **  |
|                  |                        | Efficiency (fF/pA)                    | 14                          | -0.19405   | 0.01992  | 17                                                   | -0,13239   | 0.01426  | Unpaired t-test : 0,015                   | *   |
| K <sup>+</sup>   | IV curve               |                                       | 14                          |            |          | 15                                                   |            |          | two-way anova / factor phenotype : 0,65   | ns  |

Table S15

Figure 7B

|       |                         | Relative expression PM P70 protein                     |        |        |                                                               |       |        |
|-------|-------------------------|--------------------------------------------------------|--------|--------|---------------------------------------------------------------|-------|--------|
|       |                         | <i>Pex1</i> <sup>fl/fl</sup>                           |        |        | <i>VGlut3</i> <sup>cre/cre</sup> <i>Pex1</i> <sup>fl/fl</sup> |       |        |
|       |                         | n (mice)                                               | Mean   | S.E.M. | n (mice)                                                      | Mean  | S.E.M. |
| 8 kHz | <i>statistical test</i> | 4                                                      | 100.00 | 1.66   | 8                                                             | 66.95 | 4.14   |
|       |                         | unpaired t-test with Welch's correction, **** P<0.0001 |        |        |                                                               |       |        |

## Table S16

Figure S1C

| Relative expression Pex1 protein |                                                      |        |                                                           |       |        |  |
|----------------------------------|------------------------------------------------------|--------|-----------------------------------------------------------|-------|--------|--|
| <i>Pex1</i> <sup>fl/fl</sup>     |                                                      |        | <i>Gfi1</i> <sup>cre/+</sup> <i>Pex1</i> <sup>fl/fl</sup> |       |        |  |
| n (mice)                         | Mean                                                 | S.E.M. | n (mice)                                                  | Mean  | S.E.M. |  |
| 3                                | 100.00                                               | 26.84  | 5                                                         | 86.22 | 17.11  |  |
| <i>statistical test</i>          | unpaired t-test with Welch's correction, ns P=0.6893 |        |                                                           |       |        |  |

Figure S1D

| Relative expression Pex1 protein |                                                       |        |                                                               |       |        |  |
|----------------------------------|-------------------------------------------------------|--------|---------------------------------------------------------------|-------|--------|--|
| <i>Pex1</i> <sup>fl/fl</sup>     |                                                       |        | <i>VGlut3</i> <sup>cre/cre</sup> <i>Pex1</i> <sup>fl/fl</sup> |       |        |  |
| n (mice)                         | Mean                                                  | S.E.M. | n (mice)                                                      | Mean  | S.E.M. |  |
| 4                                | 100.00                                                | 6.81   | 8                                                             | 13.88 | 3.54   |  |
| <i>statistical test</i>          | unpaired t-test with Welch's correction, *** P=0.0001 |        |                                                               |       |        |  |



Table S17

Figure S2A-L

|          |          |                    | Slope wave I amplitude       |                               |        |                                                           |       |        |
|----------|----------|--------------------|------------------------------|-------------------------------|--------|-----------------------------------------------------------|-------|--------|
|          |          |                    | <i>Pex1</i> <sup>fl/fl</sup> |                               |        | <i>Gfi1</i> <sup>cre/+</sup> <i>Pex1</i> <sup>fl/fl</sup> |       |        |
|          |          |                    | n                            | Mean                          | S.E.M. | n                                                         | Mean  | S.E.M. |
| 1 month  | 5.6 kHz  | <i>statistical</i> | 6                            | 0.145                         | 0.002  | 12                                                        | 0.008 | 0.001  |
|          |          |                    |                              | unpaired T-test, *** P=0.0005 |        |                                                           |       |        |
|          | 8 kHz    | <i>statistical</i> | 6                            | 0.019                         | 0.003  | 12                                                        | 0.011 | 0.001  |
|          |          |                    |                              | unpaired T-test, ** P=0.0048  |        |                                                           |       |        |
|          | 11.3 kHz | <i>statistical</i> | 6                            | 0.026                         | 0.002  | 12                                                        | 0.017 | 0.001  |
|          |          |                    |                              | unpaired T-test, ** P=0.0024  |        |                                                           |       |        |
|          | 16 kHz   | <i>statistical</i> | 6                            | 0.021                         | 0.002  | 12                                                        | 0.012 | 0.001  |
| 4 months |          |                    |                              | unpaired T-test, ** P=0.0036  |        |                                                           |       |        |
|          | 22.6 kHz | <i>statistical</i> | 6                            | 0.020                         | 0.002  | 12                                                        | 0.011 | 0.002  |
|          |          |                    |                              | unpaired T-test, ** P=0.0060  |        |                                                           |       |        |
|          | 32 kHz   | <i>statistical</i> | 6                            | 0.012                         | 0.001  | 12                                                        | 0.007 | 0.001  |
|          |          |                    |                              | unpaired T-test, ** P=0.0087  |        |                                                           |       |        |
|          | 5.6 kHz  | <i>statistical</i> | 8                            | 0.010                         | 0.001  | 9                                                         | 0.006 | 0.001  |
|          |          |                    |                              | unpaired T-test, ** P=0.0037  |        |                                                           |       |        |
| 4 months | 8 kHz    | <i>statistical</i> | 8                            | 0.012                         | 0.002  | 9                                                         | 0.007 | 0.001  |
|          |          |                    |                              | unpaired T-test, * P=0.0106   |        |                                                           |       |        |
|          | 11.3 kHz | <i>statistical</i> | 8                            | 0.016                         | 0.002  | 9                                                         | 0.010 | 0.001  |
|          |          |                    |                              | unpaired T-test, ** P=0.0026  |        |                                                           |       |        |
|          | 16 kHz   | <i>statistical</i> | 8                            | 0.014                         | 0.001  | 9                                                         | 0.009 | 0.001  |
|          |          |                    |                              | unpaired T-test, * P=0.0270   |        |                                                           |       |        |
|          | 22.6 kHz | <i>statistical</i> | 8                            | 0.010                         | 0.002  | 9                                                         | 0.007 | 0.002  |
| 4 months |          |                    |                              | unpaired T-test, ns P=0.2770  |        |                                                           |       |        |
|          | 32 kHz   | <i>statistical</i> | 8                            | 0.005                         | 0.002  | 9                                                         | 0.002 | 0.001  |
|          |          |                    |                              | unpaired T-test, ns P=0.1669  |        |                                                           |       |        |

Table S18

Figure S4A-L

|          |          |                         | Slope wave I amplitude       |                               |        |                                                               |       |        |
|----------|----------|-------------------------|------------------------------|-------------------------------|--------|---------------------------------------------------------------|-------|--------|
|          |          |                         | <i>Pex1</i> <sup>fl/fl</sup> |                               |        | <i>VGlut3</i> <sup>cre/cre</sup> <i>Pex1</i> <sup>fl/fl</sup> |       |        |
|          |          |                         | n                            | Mean                          | S.E.M. | n                                                             | Mean  | S.E.M. |
| 1 month  | 5.6 kHz  | <i>statistical test</i> | 16                           | 0.012                         | 0.001  | 12                                                            | 0.008 | 0.001  |
|          |          |                         |                              | unpaired T-test, * P=0.0174   |        |                                                               |       |        |
|          | 8 kHz    | <i>statistical test</i> | 16                           | 0.016                         | 0.001  | 12                                                            | 0.011 | 0.001  |
|          |          |                         |                              | unpaired T-test, * P=0.0175   |        |                                                               |       |        |
|          | 11.3 kHz | <i>statistical test</i> | 16                           | 0.020                         | 0.002  | 12                                                            | 0.015 | 0.001  |
|          |          |                         |                              | unpaired T-test, * P=0.0283   |        |                                                               |       |        |
|          | 16 kHz   | <i>statistical test</i> | 16                           | 0.017                         | 0.001  | 12                                                            | 0.013 | 0.001  |
| 4 months |          |                         |                              | unpaired T-test, * P=0.00265  |        |                                                               |       |        |
|          | 22.6 kHz | <i>statistical test</i> | 16                           | 0.014                         | 0.001  | 12                                                            | 0.010 | 0.001  |
|          |          |                         |                              | unpaired T-test, ns P=0.0668  |        |                                                               |       |        |
|          | 32 kHz   | <i>statistical test</i> | 16                           | 0.010                         | 0.001  | 11                                                            | 0.007 | 0.000  |
|          |          |                         |                              | unpaired T-test, ns P=0.0544  |        |                                                               |       |        |
|          | 5.6 kHz  | <i>statistical test</i> | 8                            | 0.008                         | 0.001  | 9                                                             | 0.005 | 0.000  |
|          |          |                         |                              | unpaired T-test, *** P=0.0007 |        |                                                               |       |        |
| 4 months | 8 kHz    | <i>statistical test</i> | 8                            | 0.011                         | 0.001  | 9                                                             | 0.007 | 0.001  |
|          |          |                         |                              | unpaired T-test, ** P=0.0014  |        |                                                               |       |        |
|          | 11.3 kHz | <i>statistical test</i> | 8                            | 0.016                         | 0.002  | 9                                                             | 0.008 | 0.000  |
|          |          |                         |                              | unpaired T-test, ** P=0.0028  |        |                                                               |       |        |
|          | 16 kHz   | <i>statistical test</i> | 8                            | 0.011                         | 0.001  | 9                                                             | 0.007 | 0.001  |
|          |          |                         |                              | unpaired T-test, ** P=0.0040  |        |                                                               |       |        |
|          | 22.6 kHz | <i>statistical test</i> | 8                            | 0.010                         | 0.001  | 9                                                             | 0.006 | 0.000  |
| 4 months |          |                         |                              | unpaired T-test, * P=0.0101   |        |                                                               |       |        |
|          | 32 kHz   | <i>statistical test</i> | 8                            | 0.006                         | 0.001  | 9                                                             | 0.005 | 0.000  |
|          |          |                         |                              | unpaired T-test, ns P=0.0807  |        |                                                               |       |        |

**Figure S6A**

| S6A      |                         | % of matched ribbon synapse/IHC                          |         |        |        |                                                               |         |        |        |
|----------|-------------------------|----------------------------------------------------------|---------|--------|--------|---------------------------------------------------------------|---------|--------|--------|
|          |                         | <i>Pex1</i> <sup>fl/fl</sup>                             |         |        |        | <i>VGlut3</i> <sup>cre/cre</sup> <i>Pex1</i> <sup>fl/fl</sup> |         |        |        |
|          |                         | n (mice)                                                 | n (IHC) | Mean   | S.E.M. | n (mice)                                                      | n (IHC) | Mean   | S.E.M. |
| 8 kHz    | <i>statistical test</i> | 6                                                        | 21      | 100.90 | 1.39   | 6                                                             | 23      | 101.80 | 1.40   |
|          |                         | 2way ANOVA Bonferroni's multicomparison test, ns P>0.999 |         |        |        |                                                               |         |        |        |
| 22.6 kHz | <i>statistical test</i> | 4                                                        | 14      | 100.10 | 2.04   | 6                                                             | 22      | 101.90 | 1.41   |
|          |                         | 2way ANOVA Bonferroni's multicomparison test, ns P>0.999 |         |        |        |                                                               |         |        |        |

### Figure S6B

| S6B                                                  |                         | % CtBP2 puncta _ 8 KHz              |         |       |        |          |         |       |        |
|------------------------------------------------------|-------------------------|-------------------------------------|---------|-------|--------|----------|---------|-------|--------|
|                                                      |                         | Modiolar                            |         |       |        | Pillar   |         |       |        |
|                                                      |                         | n (mice)                            | n (IHC) | Mean  | S.E.M. | n (mice) | n (IHC) | Mean  | S.E.M. |
| <i>Pex1<sup>fl/fl</sup></i>                          | <i>statistical test</i> | 5                                   | 20      | 54.43 | 3.00   | 5        | 20      | 45.57 | 2.98   |
|                                                      |                         | unpaired t-test, * <b>P=0.0420</b>  |         |       |        |          |         |       |        |
| <i>VGlut3<sup>cre/cre</sup> Pex1<sup>fl/fl</sup></i> | <i>statistical test</i> | 4                                   | 15      | 61.05 | 5.33   | 4        | 15      | 38.96 | 5.33   |
|                                                      |                         | unpaired t-test, ** <b>P=0.0066</b> |         |       |        |          |         |       |        |

**Figure S6C**

| S6C                                                  |                         | % CtBP2 puncta _ 22.6 KHz           |         |       |        |          |         |       |        |
|------------------------------------------------------|-------------------------|-------------------------------------|---------|-------|--------|----------|---------|-------|--------|
|                                                      |                         | Modiolar                            |         |       |        | Pillar   |         |       |        |
|                                                      |                         | n (mice)                            | n (IHC) | Mean  | S.E.M. | n (mice) | n (IHC) | Mean  | S.E.M. |
| <i>Pex1<sup>fl/fl</sup></i>                          | <i>statistical test</i> | 4                                   | 15      | 53.37 | 3.03   | 4        | 15      | 46.63 | 3.65   |
|                                                      |                         | unpaired t-test , ns P=0.1272       |         |       |        |          |         |       |        |
| <i>VGlut3<sup>cre/cre</sup> Pex1<sup>fl/fl</sup></i> | <i>statistical test</i> | 4                                   | 12      | 55.91 | 3.65   | 4        | 12      | 44.10 | 3.65   |
|                                                      |                         | unpaired t-test , * <b>P=0.0320</b> |         |       |        |          |         |       |        |
